# Supplementary material
Source: publisher site journal article supplement (https://www.dovepress.com/article/317672)

Supplementary Figure 1: **Details of the behavior test**

(A-D) Latency to fall during rotarod test before modeling and another 3 consecutive trials after modeling was recorded. (E) Representative images of open field test of different groups. *P < 0.05. Data are expressed as the mean ± SEM. n=7.


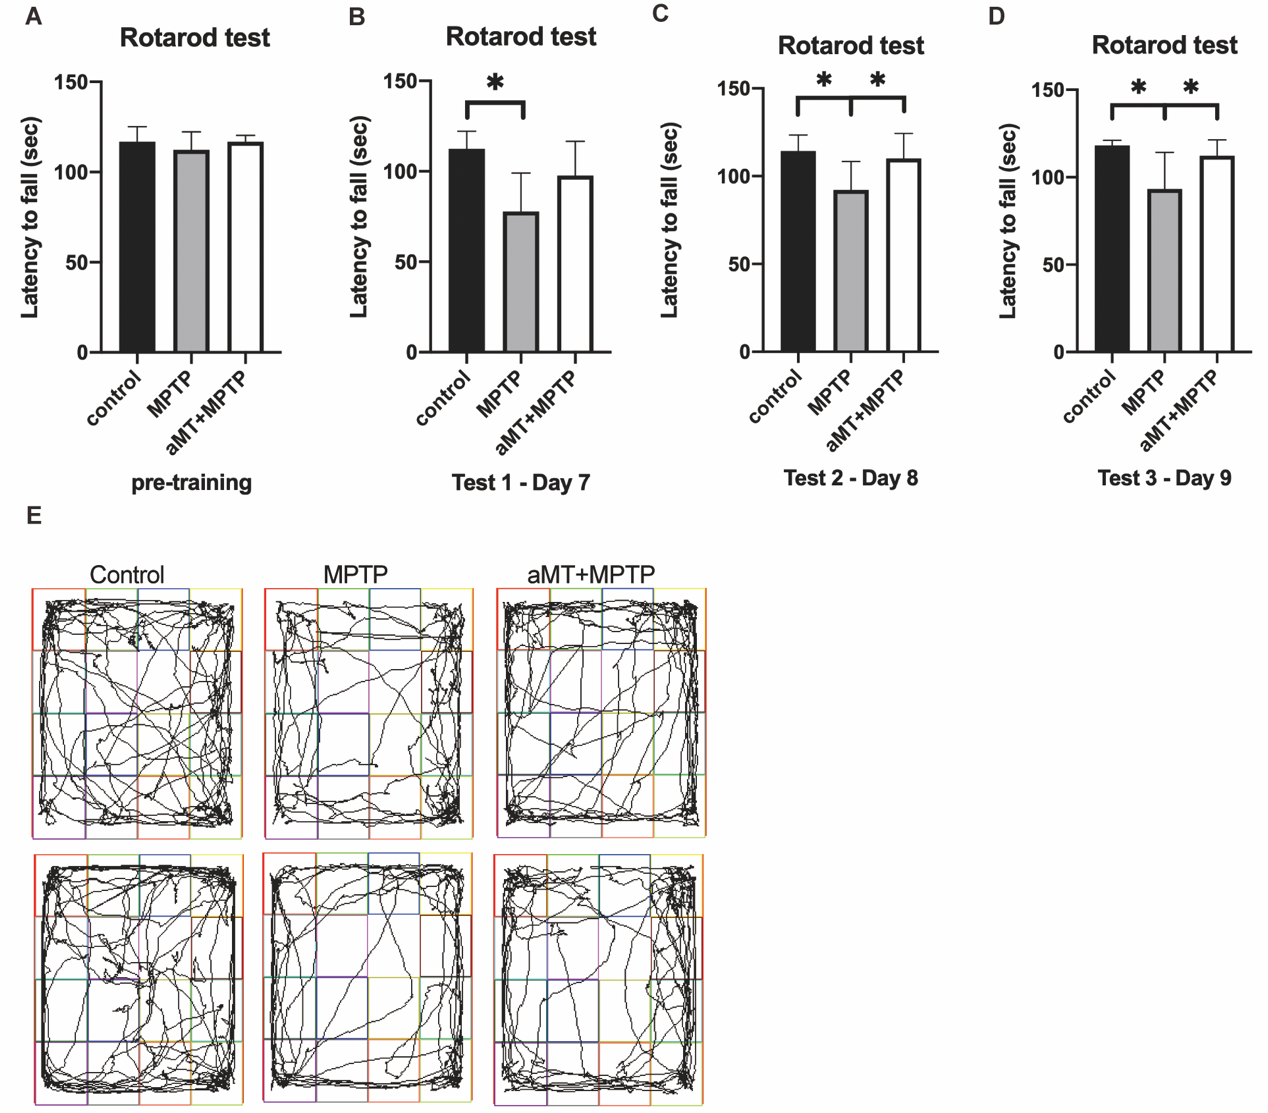


Supplementary Figure 2: **Inhibition of SIRT1 reverses the suppressive effect of melatonin on NLRP3 inflammasome activation in primary microglia**

(A-D) Immunoblot analysis of SIRT1, NLRP3, and IL18 from primary microglia cells primed with MPP+ (100 μM, 6 h), followed by ATP (2 mM, 30 min); or MPP+ (100 μM, 6 h) + melatonin (40 μM, 6 h) pretreatment, with or without selisistat (20 μM, 6 h), followed by ATP (2 mM, 30 min). Data are shown as representative plots (A) and quantified bands (B-D). aMT, melatonin. *P < 0.05, **P < 0.01, ***P<0.001, ns, no significant differences. Data are expressed as the mean ± SEM, all experiments were repeated at least 3 times.


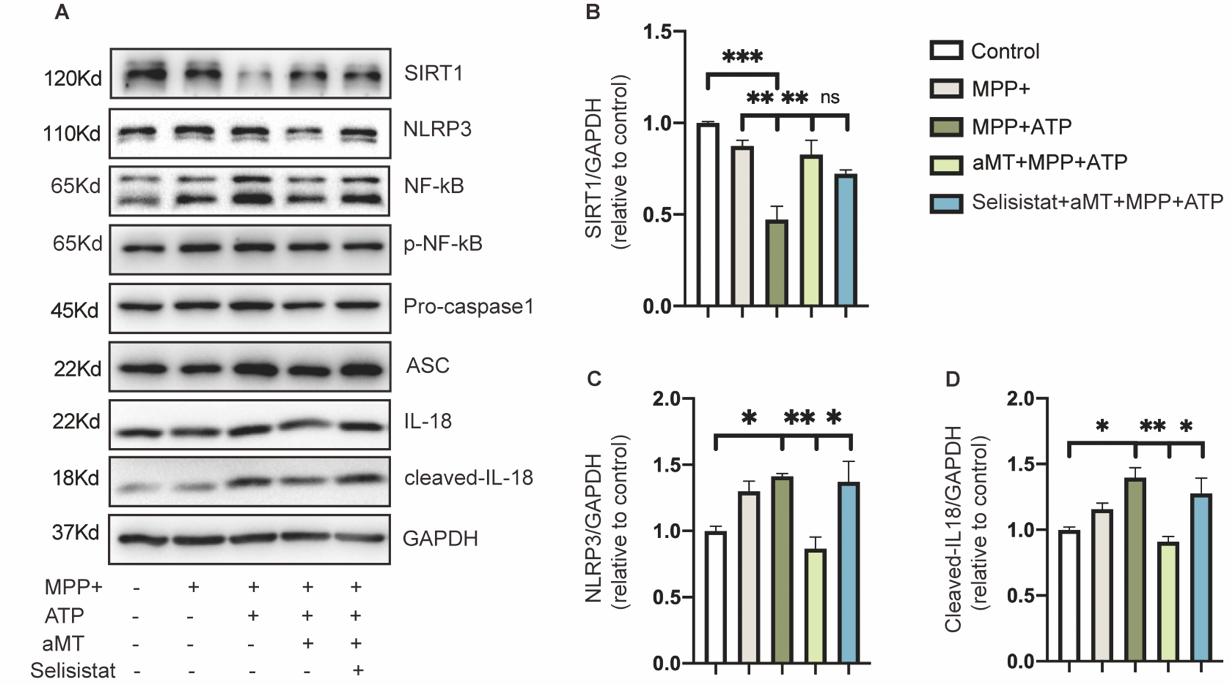


Supplementary Figure 3: **The expression of SIRT1 in the striatum and SN region in the *in vivo* study**

(A-B) Western blotting was performed to determine the expression of SIRT1 in the striatum of three groups (n=4). Data are shown as representative plots (A) and bands quantified by densitometric analysis (B). (C-D) Western blotting was performed to determine the expression of SIRT1 in the SN region of three groups (n=4). Data are shown as representative plots (C) and bands quantified by densitometric analysis (D). ns, no significant differences. Data are expressed as the mean ± SEM.


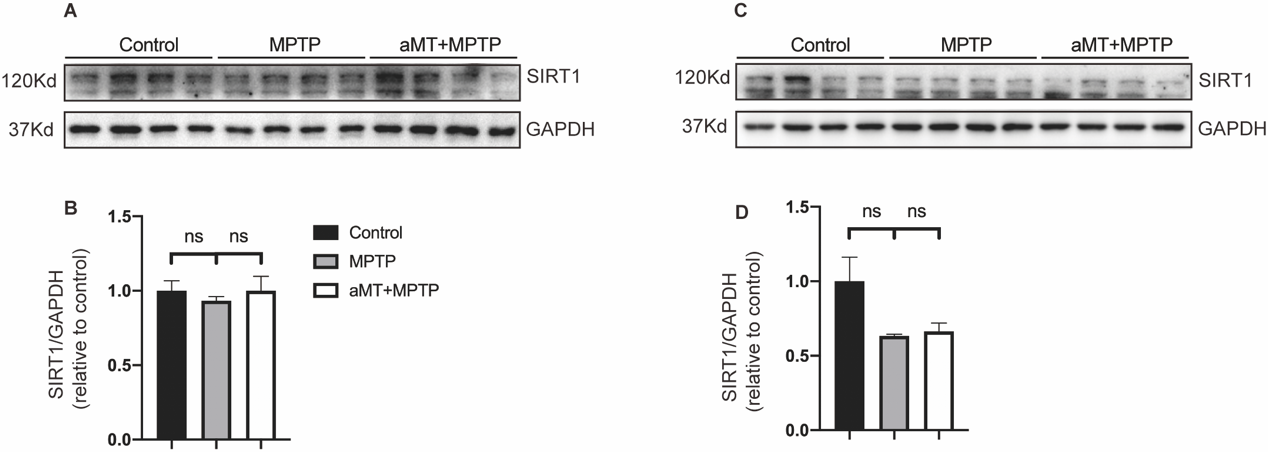

Supplement: Supplementary file 1 [file get_supplementary_file.php]
